# Supplementary material
Source: PubMed Central journal article supplement (PMC7205264)
Supplement: jciinsight-5-134838-s195.pdf [file jciinsight-5-134838-s195.pdf]

## Supplementary data

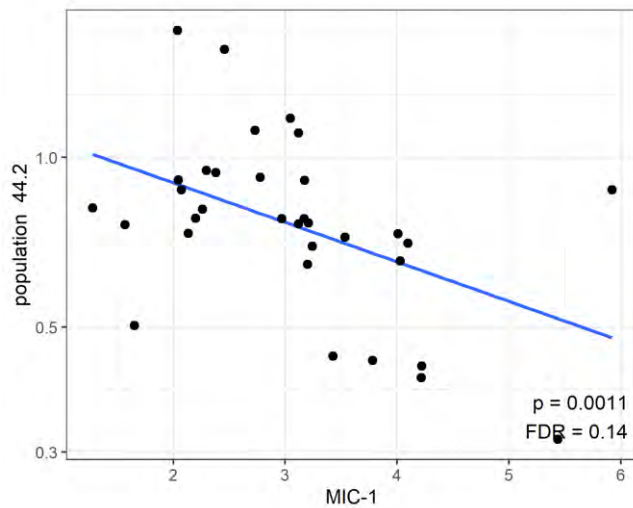

**Suppl Fig. 1: None of the correlations between immune populations and serum proteins that change during gestation is significant after correcting for multiple testing.** 26 cell populations and 434 somamers differed between V1 and V3 significantly (FDR-adjusted  $p < 0.05$ ). A subset of 18 cell populations and 129 somamers differed with fold changes higher than 1.2 or lower than 0.8. For every pairwise combination of these selected features, a Spearman correlation was computed for the change in cell population frequency, against the change in serum protein level, using all 33 subjects. For none of the correlations was FDR adjusted  $p < 0.05$ . The strongest correlation is shown in the plot.

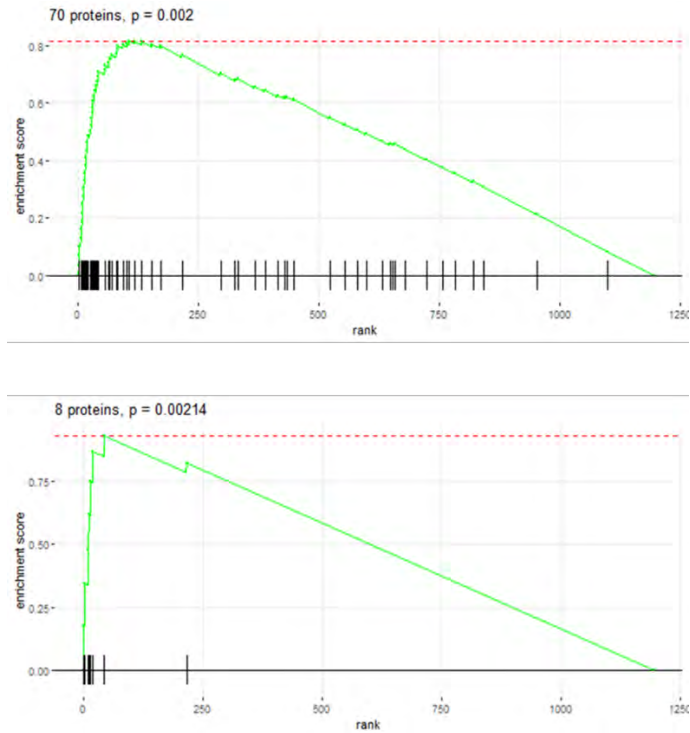

**Suppl Fig. 2: Enrichment of the protein sets previously reported to predict GA in proteins ranked by their prediction power in our dataset.** Ridge regression models to predict GA were generated using samples collected at 3 timepoints during pregnancy for the 33 women in our study. All somamers that passed QC (1194) were used as the features. Ridge regression was performed 100 times, each time using random 80% of samples as training set and remaining 20% as test set. The somamers were ranked by average coefficient from all models. The enrichment analysis was performed for previously reported 70 (top panel) and 8 (bottom panel) protein sets against this ranked list using *fgsea* Bioconductor package.

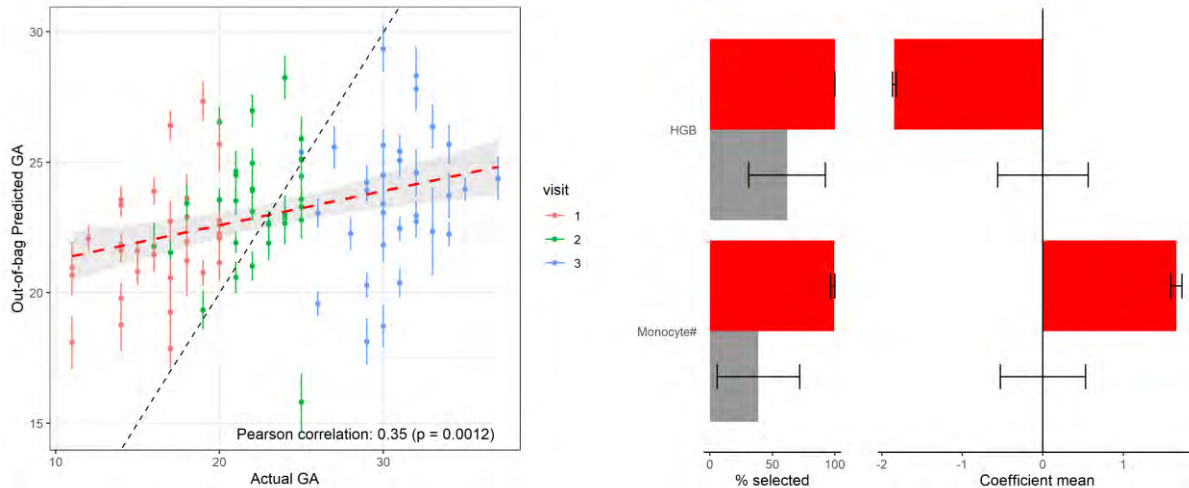

**Suppl Fig. 3: Standard clinical phenotyping parameters from complete blood count (CBC) test can be used to predict gestational age.** 9 parameters from CBC tests alone, without clinical flow cytometry, were used to generate an EN model of GA using data from 3 timepoints during pregnancy for the 33 women in our study. Predicted and observed GA correlated significantly ( $p=0.0012$ ), where red dashed line is a linear regression with 95% confidential interval, and black dashed identity line marks equal GA (left). Frequency of selection and average weights are shown for the significant model features of hemoglobin level and monocyte count (right).

### T cell Gating :

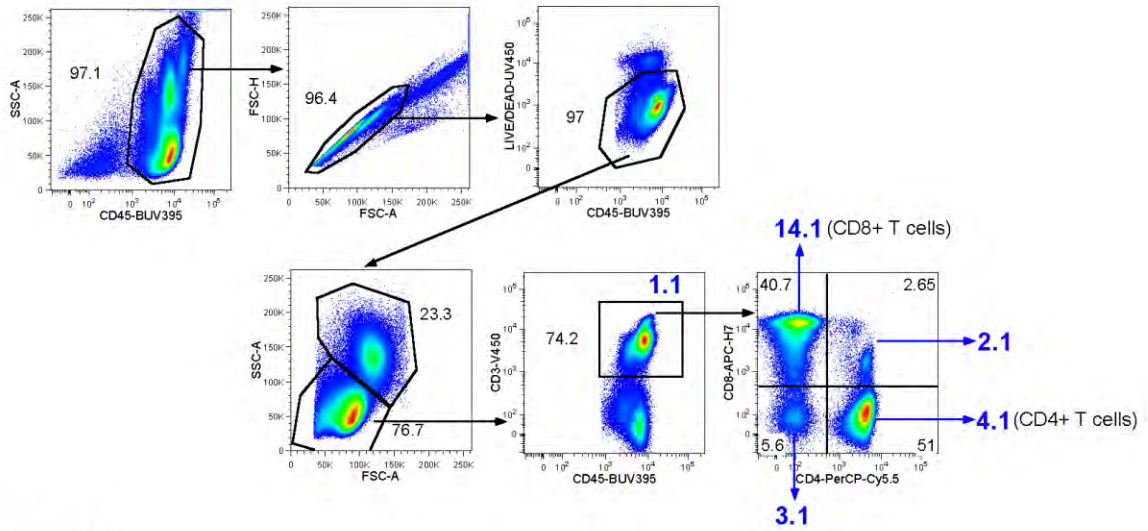

### CD4+ T cells

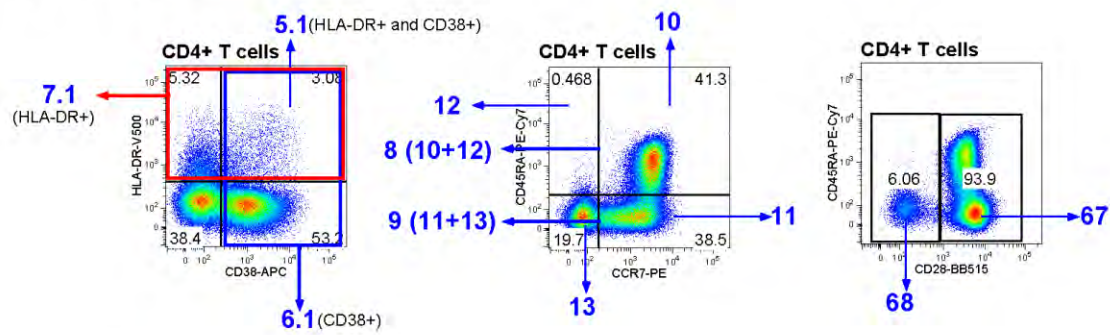

### CD8+ T cells

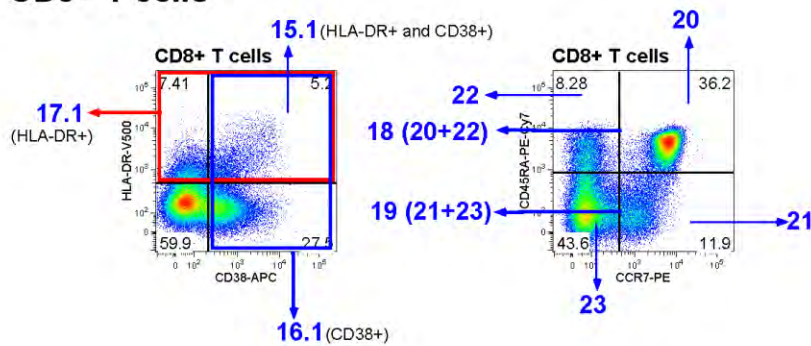

Suppl Fig. 4: Representative gating for populations identified by the T cell panel of the high parameter flow cytometry analysis (refer to Suppl Tab. 1,2).

**T helper cell Gating :**

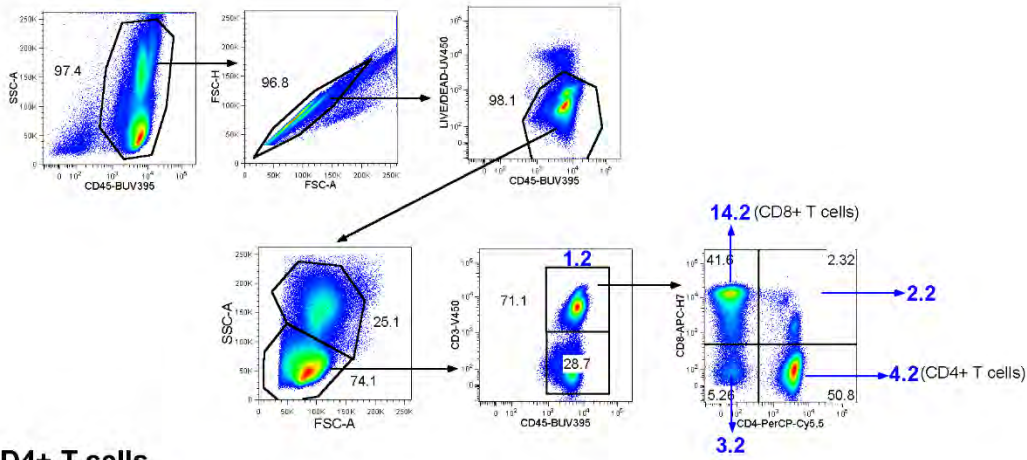

**CD4+ T cells**

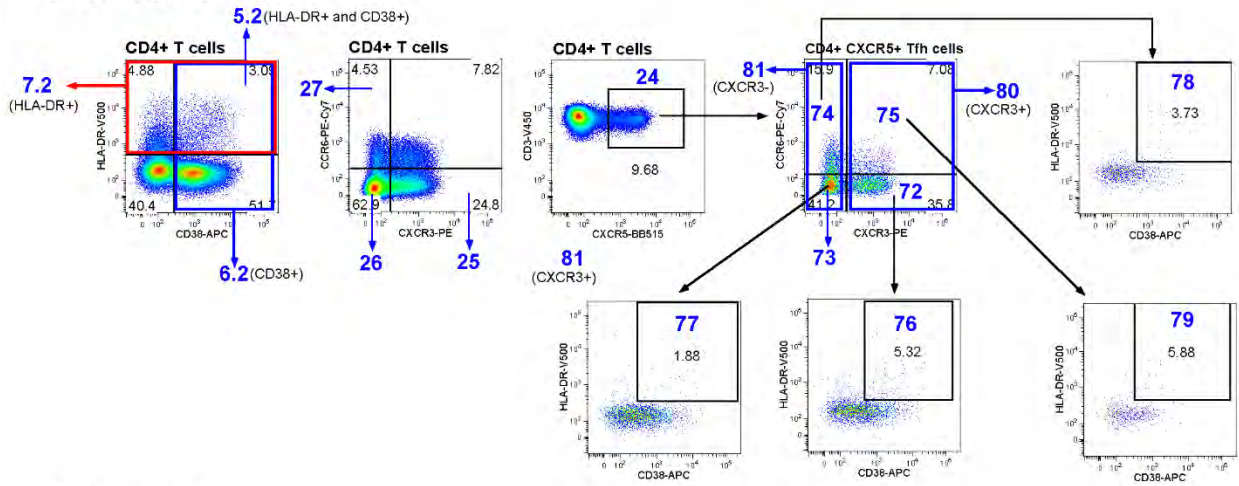

**CD8+ T cells**

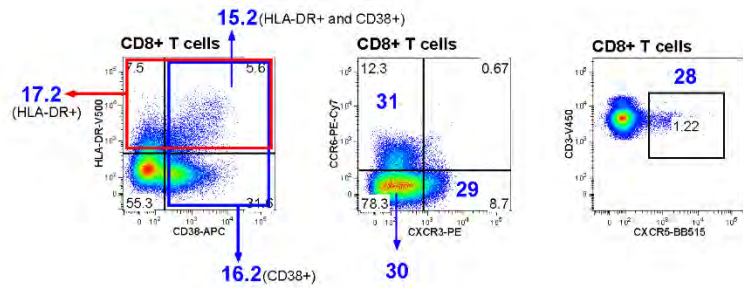

**Suppl Fig. 5: Representative gating for populations identified by the T helper panel of the high parameter flow cytometry analysis (refer to Suppl Tab. 1,2).**

**T-reg Gating :**

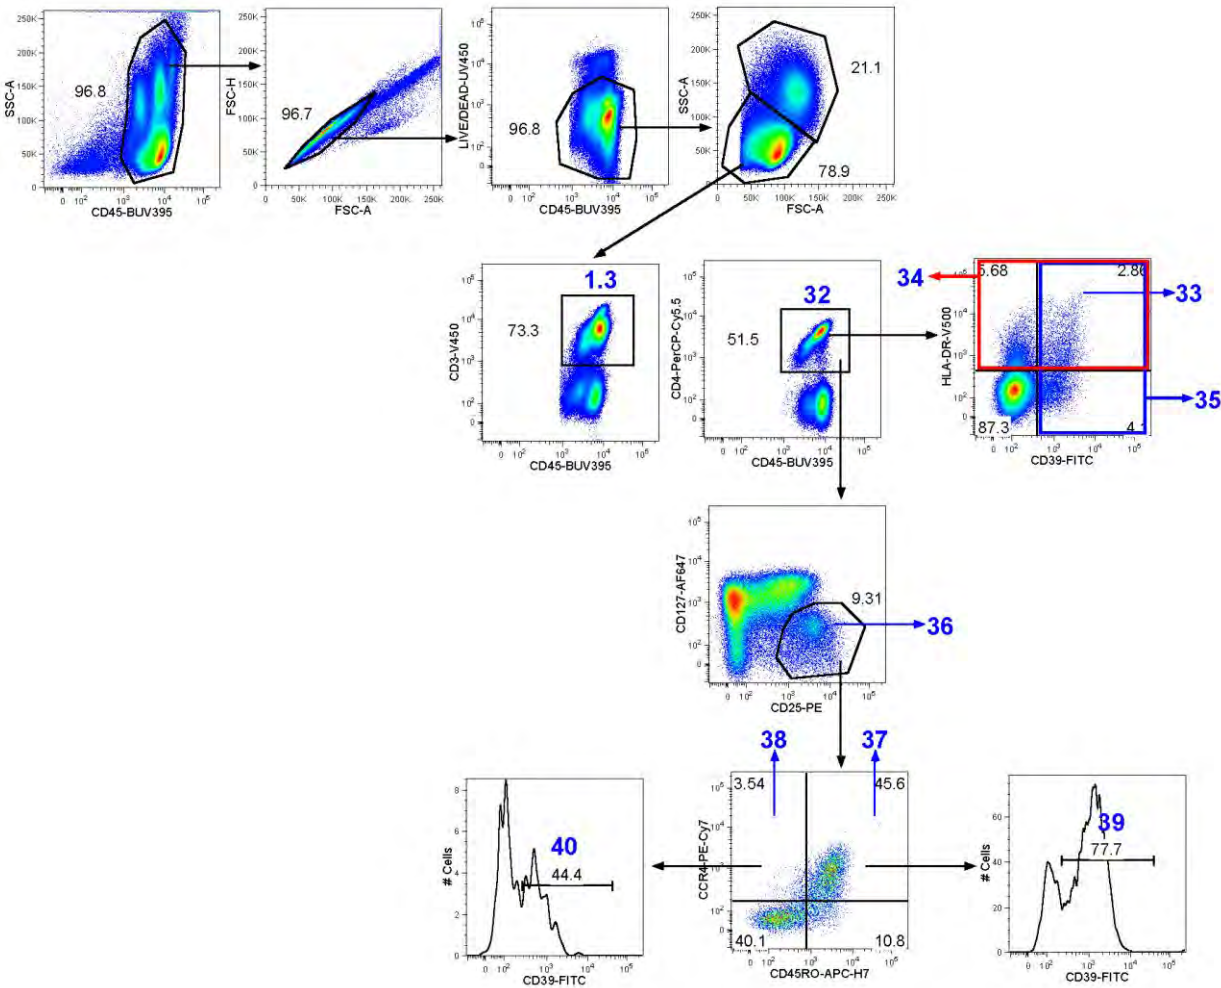

**Suppl Fig. 6: Representative gating for populations identified by the T Reg panel of the high parameter flow cytometry analysis (refer to Suppl Tab. 1,2).**

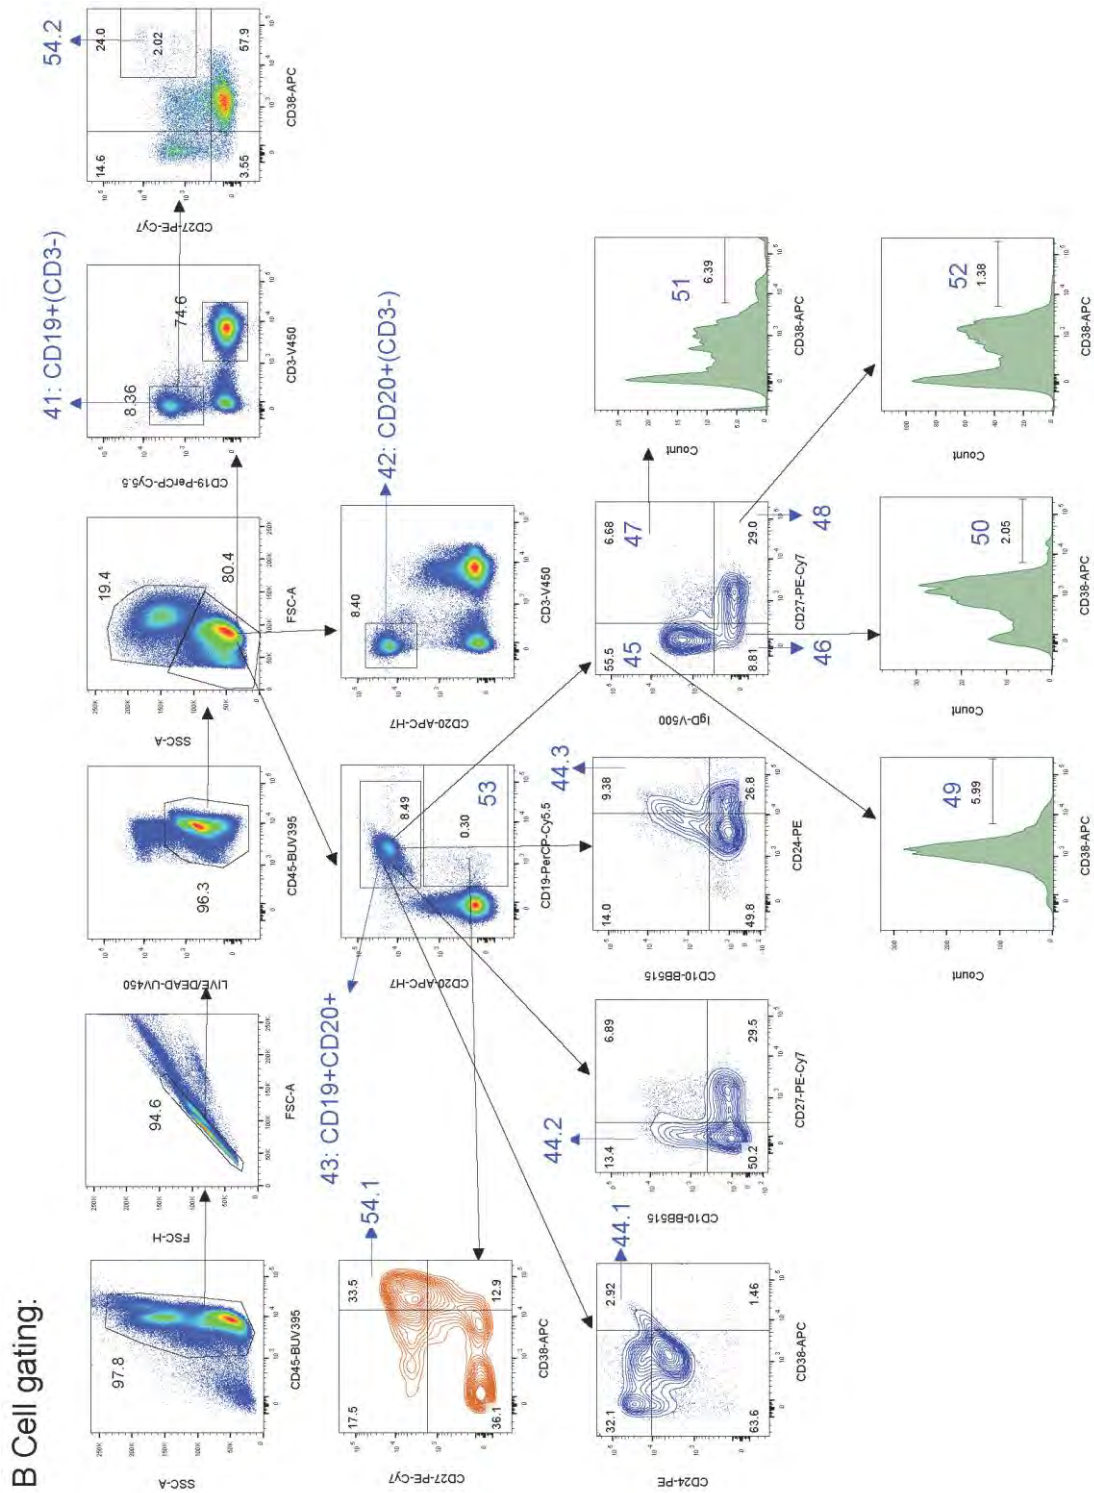

Suppl Fig. 7: Representative gating for populations identified by the B cell panel of the high parameter flow cytometry analysis (refer to Suppl Tab. 1,2).

DC Mon NK Cell gating:

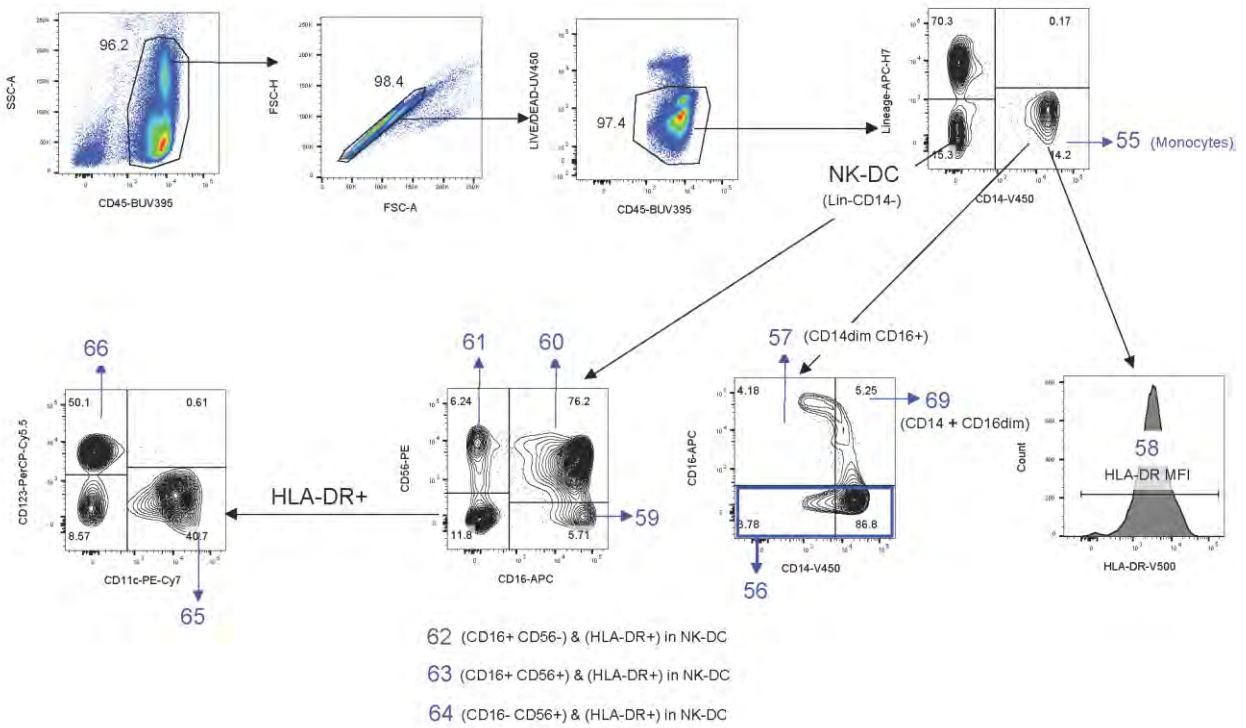

Suppl Fig. 8: Representative gating for populations identified by the DC/Mono/NK panel of the high parameter flow cytometry analysis (refer to Suppl Tab. 1,2).



|                       |             | HIPc-10c  |               |                   |              |                 |                       |
|-----------------------|-------------|-----------|---------------|-------------------|--------------|-----------------|-----------------------|
|                       |             | T lineage |               |                   | B lineage    | Myeloid lineage |                       |
| Excitation wavelength | Fluorochrom | PMT name  | T cell        | Treg              | Thelper      | B cell          | DC/Mono/NK            |
| 355 nm                | BUV395      | V450      | CD45          | CD45              | CD45         | CD45            | CD45                  |
|                       |             |           | <i>HI30</i>   | <i>HI30</i>       | <i>HI30</i>  | <i>HI30</i>     | <i>HI30</i>           |
|                       | UV450       | V545      | Viability     | Viability         | Viability    | Viability       | Viability             |
| 407 nm                | V450        | V605      | CD3           | CD3               | CD3          | CD3             | CD14                  |
|                       |             |           | <i>UCHT1</i>  | <i>UCHT1</i>      | <i>UCHT1</i> | <i>UCHT1</i>    | <i>MOP9</i>           |
|                       | V500        | V655      | HLA-DR        | HLA-DR            | HLA-DR       | IgD             | HLA-DR                |
| 488 nm                | FITC        | B515      | CD28          | CD39              | CXCR5        | CD10            | CD163                 |
|                       |             |           | <i>CD28.2</i> | <i>Tu66</i>       | <i>RF8B2</i> | <i>HI10a</i>    | <i>GHI/61</i>         |
|                       | PcP-Cy5.5   | B710      | CD4           | CD4               | CD4          | CD19            | CD123                 |
| 532 nm                | PE          | G560      | CD197         | CD25              | CXCR3        | CD24            | CD56                  |
|                       |             |           | <i>150503</i> | <i>2A3</i>        | <i>1C6</i>   | <i>ML5</i>      | <i>B159</i>           |
|                       | PE-Cy7      | G780      | CD45-RA       | CCR4              | CCR6         | CD27            | CD11c                 |
| 633 nm                | APC         | R660      | CD38          | CD127             | CD38         | CD38            | CD16                  |
|                       |             |           | <i>HIT2</i>   | <i>nIL-7R-M21</i> | <i>HIT2</i>  | <i>HIT2</i>     | <i>B73.1</i>          |
|                       | APC-Cy7     | R780      | CD8           | CD45-RO           | CD8          | CD20            | CD3+CD19+CD20         |
|                       |             |           | <i>SK1</i>    | <i>UCHL1</i>      | <i>SK1</i>   | <i>2H7</i>      | <i>SK7+SI25C1+2H7</i> |

Suppl Table 1: Five parallel 10 color staining panels used for high parameter flow cytometry analysis.

| Tube     | Pop. Code | Gate 1 | Gate 2  | Gate 3  | Gate 4 | Gate 5 | Parent population        | Subset name                    | Subset name 2 |
|----------|-----------|--------|---------|---------|--------|--------|--------------------------|--------------------------------|---------------|
| T-cell   | 1.1       | G03    | G04/G08 |         |        |        | Viable mononuclear cells | T cells                        |               |
|          | 1.2       | G03    | G04/G08 |         |        |        | DN T cells               | DN T cells                     |               |
|          | 1.3       | G03    | G04/G08 |         |        |        | G03                      | CD3+ viable mononuclear cells  |               |
|          | 1.4       | G03    | G04/G08 |         |        |        | G03                      | CD4+CD8- T cells               |               |
|          | 1.5       | G03    | G04/G08 |         |        |        | G03                      | CD4+CD8- T cells               |               |
|          | 1.6       | G03    | G04/G08 |         |        |        | G03                      | CD4+CD8- T cells               |               |
|          | 1.7       | G03    | G04/G08 |         |        |        | G03                      | CD4+CD8- T cells               |               |
|          | 1.8       | G03    | G04/G08 |         |        |        | G03                      | CD4+CD8- T cells               |               |
|          | 1.9       | G03    | G04/G08 |         |        |        | G03                      | CD4+CD8- T cells               |               |
|          | 1.10      | G03    | G04/G08 |         |        |        | G03                      | CD4+CD8- T cells               |               |
|          | 1.11      | G03    | G04/G08 |         |        |        | G03                      | CD4+CD8- T cells               |               |
|          | 1.12      | G03    | G04/G08 |         |        |        | G03                      | CD4+CD8- T cells               |               |
|          | 1.13      | G03    | G04/G08 |         |        |        | G03                      | CD4+CD8- T cells               |               |
|          | 1.14      | G03    | G04/G08 |         |        |        | G03                      | CD4+CD8- T cells               |               |
| T-helper | 2.1       | G03    | G04/G08 |         |        |        | Viable mononuclear cells | T-helper                       |               |
|          | 2.2       | G03    | G04/G08 |         |        |        | G03                      | CD3+HLA-DR+ activated T-helper |               |
|          | 2.3       | G03    | G04/G08 |         |        |        | G03                      | CD3+HLA-DR+ activated T-helper |               |
|          | 2.4       | G03    | G04/G08 |         |        |        | G03                      | CD3+HLA-DR+ activated T-helper |               |
|          | 2.5       | G03    | G04/G08 |         |        |        | G03                      | CD3+HLA-DR+ activated T-helper |               |
|          | 2.6       | G03    | G04/G08 |         |        |        | G03                      | CD3+HLA-DR+ activated T-helper |               |
|          | 2.7       | G03    | G04/G08 |         |        |        | G03                      | CD3+HLA-DR+ activated T-helper |               |
|          | 2.8       | G03    | G04/G08 |         |        |        | G03                      | CD3+HLA-DR+ activated T-helper |               |
|          | 2.9       | G03    | G04/G08 |         |        |        | G03                      | CD3+HLA-DR+ activated T-helper |               |
|          | 2.10      | G03    | G04/G08 |         |        |        | G03                      | CD3+HLA-DR+ activated T-helper |               |
|          | 2.11      | G03    | G04/G08 |         |        |        | G03                      | CD3+HLA-DR+ activated T-helper |               |
|          | 2.12      | G03    | G04/G08 |         |        |        | G03                      | CD3+HLA-DR+ activated T-helper |               |
|          | 2.13      | G03    | G04/G08 |         |        |        | G03                      | CD3+HLA-DR+ activated T-helper |               |
|          | 2.14      | G03    | G04/G08 |         |        |        | G03                      | CD3+HLA-DR+ activated T-helper |               |
| T-reg    | 3.1       | G03    | G04/G08 |         |        |        | Viable mononuclear cells | T-reg                          |               |
|          | 3.2       | G03    | G04/G08 |         |        |        | G03                      | CD3+HLA-DR+ activated T-reg    |               |
|          | 3.3       | G03    | G04/G08 |         |        |        | G03                      | CD3+HLA-DR+ activated T-reg    |               |
|          | 3.4       | G03    | G04/G08 |         |        |        | G03                      | CD3+HLA-DR+ activated T-reg    |               |
|          | 3.5       | G03    | G04/G08 |         |        |        | G03                      | CD3+HLA-DR+ activated T-reg    |               |
|          | 3.6       | G03    | G04/G08 |         |        |        | G03                      | CD3+HLA-DR+ activated T-reg    |               |
|          | 3.7       | G03    | G04/G08 |         |        |        | G03                      | CD3+HLA-DR+ activated T-reg    |               |
|          | 3.8       | G03    | G04/G08 |         |        |        | G03                      | CD3+HLA-DR+ activated T-reg    |               |
|          | 3.9       | G03    | G04/G08 |         |        |        | G03                      | CD3+HLA-DR+ activated T-reg    |               |
|          | 3.10      | G03    | G04/G08 |         |        |        | G03                      | CD3+HLA-DR+ activated T-reg    |               |
|          | 3.11      | G03    | G04/G08 |         |        |        | G03                      | CD3+HLA-DR+ activated T-reg    |               |
|          | 3.12      | G03    | G04/G08 |         |        |        | G03                      | CD3+HLA-DR+ activated T-reg    |               |
|          | 3.13      | G03    | G04/G08 |         |        |        | G03                      | CD3+HLA-DR+ activated T-reg    |               |
|          | B-cell    | 4.1    | G03     | G04/G08 |        |        |                          | Viable mononuclear cells       | B-cell        |
| 4.2      |           | G03    | G04/G08 |         |        |        | G03                      | CD3+HLA-DR+ activated B-cell   |               |
| 4.3      |           | G03    | G04/G08 |         |        |        | G03                      | CD3+HLA-DR+ activated B-cell   |               |
| 4.4      |           | G03    | G04/G08 |         |        |        | G03                      | CD3+HLA-DR+ activated B-cell   |               |
| 4.5      |           | G03    | G04/G08 |         |        |        | G03                      | CD3+HLA-DR+ activated B-cell   |               |
| 4.6      |           | G03    | G04/G08 |         |        |        | G03                      | CD3+HLA-DR+ activated B-cell   |               |
| 4.7      |           | G03    | G04/G08 |         |        |        | G03                      | CD3+HLA-DR+ activated B-cell   |               |
| 4.8      |           | G03    | G04/G08 |         |        |        | G03                      | CD3+HLA-DR+ activated B-cell   |               |
| 4.9      |           | G03    | G04/G08 |         |        |        | G03                      | CD3+HLA-DR+ activated B-cell   |               |
| 4.10     |           | G03    | G04/G08 |         |        |        | G03                      | CD3+HLA-DR+ activated B-cell   |               |
| 4.11     |           | G03    | G04/G08 |         |        |        | G03                      | CD3+HLA-DR+ activated B-cell   |               |
| 4.12     |           | G03    | G04/G08 |         |        |        | G03                      | CD3+HLA-DR+ activated B-cell   |               |
| 4.13     |           | G03    | G04/G08 |         |        |        | G03                      | CD3+HLA-DR+ activated B-cell   |               |
| 4.14     |           | G03    | G04/G08 |         |        |        | G03                      | CD3+HLA-DR+ activated B-cell   |               |
| DC       | 5.1       | G03    | G04/G08 |         |        |        | Viable mononuclear cells | DC                             |               |
|          | 5.2       | G03    | G04/G08 |         |        |        | G03                      | CD3+HLA-DR+ activated DC       |               |
|          | 5.3       | G03    | G04/G08 |         |        |        | G03                      | CD3+HLA-DR+ activated DC       |               |
|          | 5.4       | G03    | G04/G08 |         |        |        | G03                      | CD3+HLA-DR+ activated DC       |               |
|          | 5.5       | G03    | G04/G08 |         |        |        | G03                      | CD3+HLA-DR+ activated DC       |               |
|          | 5.6       | G03    | G04/G08 |         |        |        | G03                      | CD3+HLA-DR+ activated DC       |               |
|          | 5.7       | G03    | G04/G08 |         |        |        | G03                      | CD3+HLA-DR+ activated DC       |               |
|          | 5.8       | G03    | G04/G08 |         |        |        | G03                      | CD3+HLA-DR+ activated DC       |               |
|          | 5.9       | G03    | G04/G08 |         |        |        | G03                      | CD3+HLA-DR+ activated DC       |               |
|          | 5.10      | G03    | G04/G08 |         |        |        | G03                      | CD3+HLA-DR+ activated DC       |               |
|          | 5.11      | G03    | G04/G08 |         |        |        | G03                      | CD3+HLA-DR+ activated DC       |               |
|          | 5.12      | G03    | G04/G08 |         |        |        | G03                      | CD3+HLA-DR+ activated DC       |               |
|          | 5.13      | G03    | G04/G08 |         |        |        | G03                      | CD3+HLA-DR+ activated DC       |               |
|          | 5.14      | G03    | G04/G08 |         |        |        | G03                      | CD3+HLA-DR+ activated DC       |               |
| Mono     | 6.1       | G03    | G04/G08 |         |        |        | Viable mononuclear cells | Mono                           |               |
|          | 6.2       | G03    | G04/G08 |         |        |        | G03                      | CD3+HLA-DR+ activated Mono     |               |
|          | 6.3       | G03    | G04/G08 |         |        |        | G03                      | CD3+HLA-DR+ activated Mono     |               |
|          | 6.4       | G03    | G04/G08 |         |        |        | G03                      | CD3+HLA-DR+ activated Mono     |               |
|          | 6.5       | G03    | G04/G08 |         |        |        | G03                      | CD3+HLA-DR+ activated Mono     |               |
|          | 6.6       | G03    | G04/G08 |         |        |        | G03                      | CD3+HLA-DR+ activated Mono     |               |
|          | 6.7       | G03    | G04/G08 |         |        |        | G03                      | CD3+HLA-DR+ activated Mono     |               |
|          | 6.8       | G03    | G04/G08 |         |        |        | G03                      | CD3+HLA-DR+ activated Mono     |               |
|          | 6.9       | G03    | G04/G08 |         |        |        | G03                      | CD3+HLA-DR+ activated Mono     |               |
|          | 6.10      | G03    | G04/G08 |         |        |        | G03                      | CD3+HLA-DR+ activated Mono     |               |
|          | 6.11      | G03    | G04/G08 |         |        |        | G03                      | CD3+HLA-DR+ activated Mono     |               |
|          | 6.12      | G03    | G04/G08 |         |        |        | G03                      | CD3+HLA-DR+ activated Mono     |               |
|          | 6.13      | G03    | G04/G08 |         |        |        | G03                      | CD3+HLA-DR+ activated Mono     |               |
|          | 6.14      | G03    | G04/G08 |         |        |        | G03                      | CD3+HLA-DR+ activated Mono     |               |
| NK       | 7.1       | G03    | G04/G08 |         |        |        | Viable mononuclear cells | NK                             |               |
|          | 7.2       | G03    | G04/G08 |         |        |        | G03                      | CD3+HLA-DR+ activated NK       |               |
|          | 7.3       | G03    | G04/G08 |         |        |        | G03                      | CD3+HLA-DR+ activated NK       |               |
|          | 7.4       | G03    | G04/G08 |         |        |        | G03                      | CD3+HLA-DR+ activated NK       |               |
|          | 7.5       | G03    | G04/G08 |         |        |        | G03                      | CD3+HLA-DR+ activated NK       |               |
|          | 7.6       | G03    | G04/G08 |         |        |        | G03                      | CD3+HLA-DR+ activated NK       |               |
|          | 7.7       | G03    | G04/G08 |         |        |        | G03                      | CD3+HLA-DR+ activated NK       |               |
|          | 7.8       | G03    | G04/G08 |         |        |        | G03                      | CD3+HLA-DR+ activated NK       |               |
|          | 7.9       | G03    | G04/G08 |         |        |        | G03                      | CD3+HLA-DR+ activated NK       |               |
|          | 7.10      | G03    | G04/G08 |         |        |        | G03                      | CD3+HLA-DR+ activated NK       |               |
|          | 7.11      | G03    | G04/G08 |         |        |        | G03                      | CD3+HLA-DR+ activated NK       |               |
|          | 7.12      | G03    | G04/G08 |         |        |        | G03                      | CD3+HLA-DR+ activated NK       |               |
|          | 7.13      | G03    | G04/G08 |         |        |        | G03                      | CD3+HLA-DR+ activated NK       |               |
|          | 7.14      | G03    | G04/G08 |         |        |        | G03                      | CD3+HLA-DR+ activated NK       |               |

Suppl Tab 2: 79 subsets of PBMC detected by high parameter flow cytometry analysis.

| Parameter          | Group definition (n)   | Cell populations |       |       | Serum proteins |       |             |
|--------------------|------------------------|------------------|-------|-------|----------------|-------|-------------|
|                    |                        | p                | q     | ID    | p              | q     | ID          |
| Parity             | 1 (14) vs <1 (19)      | 0.055            | 0.710 | X79   | <b>0.037</b>   | 0.993 | Transferrin |
|                    |                        | 0.090            | 0.710 | X50   | 0.060          | 0.993 | C6          |
|                    |                        | 0.160            | 0.710 | X75   | 0.067          | 0.993 | FABP        |
| Maternal age       | <33 (10) vs >33 (10)   | 0.100            | 0.884 | X50   | <b>0.003</b>   | 0.764 | OMD         |
|                    |                        | 0.112            | 0.884 | X79   | <b>0.004</b>   | 0.764 | FSTL3       |
|                    |                        | 0.148            | 0.884 | X1.3  | <b>0.012</b>   | 0.998 | Cystatin.C  |
| Prev miscarriage   | no (26) vs yes (7)     | <b>0.004</b>     | 0.108 | X50   | <b>0.010</b>   | 0.840 | HGFA        |
|                    |                        | <b>0.021</b>     | 0.213 | X33   | <b>0.018</b>   | 0.840 | TSP4        |
|                    |                        | <b>0.025</b>     | 0.213 | X49   | <b>0.022</b>   | 0.840 | CHL1        |
| Gestation duration | <39 (10) vs >40 (10)   | 0.121            | 0.941 | X50   | <b>0.013</b>   | 1.000 | VEGF.sR3    |
|                    |                        | 0.235            | 0.941 | X80   | <b>0.016</b>   | 1.000 | MMP.12      |
|                    |                        | 0.248            | 0.941 | X81   | <b>0.023</b>   | 1.000 | IL.13.Ra1   |
| BMI at V1          | <23 (10) vs >28 (10)   | <b>0.030</b>     | 0.525 | X1.3  | <b>0.022</b>   | 1.000 | granzyme.A  |
|                    |                        | <b>0.040</b>     | 0.525 | X1.2  | <b>0.035</b>   | 1.000 | FABPL       |
|                    |                        | 0.238            | 0.922 | X44.2 | 0.054          | 1.000 | HCC.4       |
| Systolic BP at V1  | <108 (10) vs >118 (10) | <b>0.020</b>     | 0.515 | X44.2 | <b>0.009</b>   | 0.851 | DKK3        |
|                    |                        | 0.107            | 0.746 | X1.3  | <b>0.013</b>   | 0.851 | SLIK5       |
|                    |                        | 0.128            | 0.746 | X1.2  | <b>0.016</b>   | 0.851 | HCC.4       |

**Suppl Table 3: Immune populations and serum proteins that change during gestation do not differ between individuals based on metadata characteristics.** For each of the 26 flow populations and 434 somamers that changed between V1 and V3, the magnitude of change was compared between individuals segregated by metadata characteristics. The top 3 associations for each are shown for 6 characteristics, showing no FDR adjusted p<0.05.

| Parameter            | Range           | Complete Blood Count | Clinical Flow Cytometry |
|----------------------|-----------------|----------------------|-------------------------|
| Hemoglobin           | 11.2-15.7 g/dL  | X                    |                         |
| Platelets            | 173-369 K/uL    | X                    |                         |
| WBC                  | 3.98-10.04 K/uL | X                    |                         |
| Neutrophil %         | 34-71.1%        | X                    |                         |
| Neutrophil absolute  | 1.56-6.13 K/uL  | X                    |                         |
| Lymphocytes %        | 19.3-51.7%      | X                    |                         |
| Lymphocytes absolute | 1.18-3.74 K/uL  | X                    |                         |
| Monocyte%            | 4.7-12.5 %      | X                    |                         |
| Monocyte absolute    | 0.24-0.86 K/uL  | X                    |                         |
| CD3%                 | 57-79%          |                      | X                       |
| CD3 absolute         | 615-2348 uL     |                      | X                       |
| CD4/CD3%             | 27-59%          |                      | X                       |
| CD4/CD3 absolute     | 334-1556 uL     |                      | X                       |
| CD8/CD3%             | 13-33%          |                      | X                       |
| CD8/CD3 absolute     | 149-787 uL      |                      | X                       |
| NK cells%            | 7-31%           |                      | X                       |
| NK Cells absolute    | 109-607 uL      |                      | X                       |
| CD19%                | 6-19 %          |                      | X                       |
| CD19 absolute        | 81-493 uL       |                      | X                       |

**Suppl Table 4: Parameters determined by clinical phenotyping analysis.**
